# Supplementary material
Source: publisher site journal article supplement (https://www.spandidos-publications.com/6487/downloadSupplementary)
Supplement: Supplementary file 1 [file downloadSupplementary]

## Sheet: location_all
Table SVIII.Subcellular location
Protein ID	Locations
P02795	extr: 27, cyto_nucl: 2, nucl: 1.5, cyto: 1.5, mito: 1, lyso: 1
P52926	nucl: 32
P05121	extr: 20, E.R.: 4, lyso: 4, plas: 2, cyto: 1.5, cyto_pero: 1.5
O15075	nucl: 22, cyto: 5, plas: 2, E.R.: 1, cysk: 1, golg: 1
P04732	extr: 28, nucl: 1.5, cyto_nucl: 1.5, mito: 1, lyso: 1
Q01628	plas: 27, mito: 3, lyso: 2
P52566	cyto: 21, nucl: 5, extr: 4, mito: 2
Q8IVF2	nucl: 26.5, cyto_nucl: 14.5, cyto: 1.5, extr: 1, mito: 1, E.R.: 1, cysk: 1
Q9BXT2	plas: 22, extr: 3, cyto: 3, E.R.: 2, lyso: 1, golg: 1
O75326	extr: 7, nucl: 7, cyto: 5, lyso: 5, plas: 4, mito: 3, E.R.: 1
Q9NS25	nucl: 23, cyto: 5, mito: 2, cysk: 2
Q9Y653	plas: 21, E.R.: 8, extr: 3
Q96K17	cyto: 12.5, mito: 11, cyto_nucl: 11, nucl: 8.5
P02679	mito: 14, extr: 8, pero: 4, lyso: 4, cyto_pero: 4, cyto: 2
Q14697	plas: 12, E.R.: 9, E.R._golg: 7, extr: 5, lyso: 3, golg: 3
P46821	nucl: 27, cyto: 4, E.R.: 1
Q14061	extr: 27, mito: 3, nucl: 2
P27701	plas: 27, extr: 5
P21926	plas: 24, extr: 6, cyto: 1, mito: 1
P02751	plas: 15, extr: 10, E.R.: 5, cyto: 2
Q96S97	plas: 32
Q14533	mito: 13, cyto_nucl: 7.5, nucl: 7, cyto: 5.5, cyto_pero: 5.16667, extr: 3, plas: 1, lyso: 1
O14495	plas: 32
P04179	cyto: 17, mito: 15
O95832	plas: 28, extr: 4
P30530	plas: 24, E.R.: 4, lyso: 3, extr: 1
Q13885	cyto: 15.5, cyto_nucl: 14, nucl: 9.5, extr: 3, pero: 3, mito: 1
Q99942	nucl: 27, cyto_nucl: 15.5, cyto: 2, pero: 2, extr: 1
Q96HE7	extr: 22, lyso: 3, cyto: 2.5, cyto_pero: 2, E.R.: 1.5, E.R._golg: 1.5, plas: 1, nucl: 1
Q9NXK6	plas: 30, cyto: 1, mito: 1
P11234	cyto: 20, mito: 8, nucl: 2, extr: 1, golg: 1
P01584	nucl: 21, cyto: 7, plas: 2, extr: 1, E.R.: 1
Q9C002	extr: 21, mito: 8, cyto: 2, nucl: 1
Q8NDC0	nucl: 20.5, cyto_nucl: 13.5, cyto: 5.5, extr: 5, E.R.: 1
P23921	cyto: 21, cyto_nucl: 16.5, nucl: 8, plas: 2, extr: 1
Q6P9B6	plas: 27.5, extr_plas: 14.5, mito: 2, cyto_nucl: 1, pero: 1
Q9BXN6	nucl: 25, cyto: 6, cysk: 1
Q6JBY9	nucl: 28, cyto_nucl: 16.5, cyto: 3, plas: 1
Q01432	nucl: 16.5, cyto_nucl: 14.5, cyto: 9.5, cysk: 4, plas: 1, pero: 1
P28288	cyto: 8.5, mito: 8, E.R.: 6, cyto_nucl: 5, pero: 3, golg: 3, extr: 2, plas: 1
O75976	plas: 13, extr: 8, lyso: 5, E.R.: 3, pero: 3
P07858	extr: 26, lyso: 6
Q9Y5U9	extr: 13, lyso: 10, plas: 7, mito: 2
Q9Y673	E.R.: 21, extr: 7, cyto: 2, lyso: 2
Q07954	plas: 22.5, extr_plas: 14, E.R.: 5, extr: 4.5
Q6PI78	plas: 27, mito: 4, cyto: 1
P80297	extr: 28, nucl: 1.5, cyto_nucl: 1.5, mito: 1, lyso: 1
O60711	nucl: 30.5, cyto_nucl: 16.5, cyto: 1.5
Q9UI42	extr: 16, plas: 9, pero: 2, cyto: 1.5, E.R.: 1.5, cyto_nucl: 1.5, E.R._mito: 1.5, lyso: 1
Q14116	cyto: 18, cyto_nucl: 11.5, extr: 9, nucl: 3, mito: 1, lyso: 1
Q6PCE3	cyto: 21, cyto_nucl: 17.5, nucl: 10, extr: 1
Q6UXH1	extr: 25, mito: 3, lyso: 2, nucl: 1, cyto: 1
P09382	extr: 26, cyto: 5, cyto_nucl: 4
O15321	plas: 27, E.R.: 4, pero: 1
P17301	plas: 28, pero: 2, E.R.: 1, lyso: 1
O95810	cyto: 16.5, cyto_nucl: 13.3333, cyto_golg: 10.6667, nucl: 8, golg: 3.5, plas: 2, extr: 2
Q5SZL2	nucl: 28, cyto_nucl: 17, cyto: 4
P48060	plas: 26, pero: 6
P63313	cyto: 16.5, cyto_nucl: 14, nucl: 10.5, mito: 3, extr: 2
Q9UKV8	mito: 12, cyto: 11, cyto_nucl: 10.5, nucl: 8, extr: 1
Q4G0X4	cyto: 16, cyto_nucl: 16, nucl: 10, mito: 2, pero: 2, lyso: 2
Q9UM22	extr: 19, mito: 4, lyso: 4, plas: 3, nucl: 1, golg: 1
O43493	extr: 23, E.R.: 6, nucl: 2, golg: 1
Q5JS37	mito: 7.5, E.R._mito: 6, plas: 5, extr: 5, golg: 5, E.R.: 3.5, pero: 3, lyso: 3
P15509	plas: 24.5, extr_plas: 13.5, E.R.: 3, pero: 3, extr: 1.5
Q2TB90	cyto: 21, mito: 4, nucl: 3, cysk: 3, extr: 1
P49662	cyto: 23, cyto_nucl: 16, nucl: 7, plas: 1, extr: 1
O14832	mito: 24, cyto: 5, pero: 3
P00749	extr: 31, nucl: 1
P20908	E.R.: 11, extr: 6, lyso: 5, golg: 5, mito: 4, plas: 1
Q14764	cyto: 11, nucl: 9, pero: 5, extr: 4, plas: 1, mito: 1, cysk: 1
P43121	plas: 12.5, extr_plas: 10, extr: 6.5, pero: 6, lyso: 3, E.R.: 2.5, E.R._golg: 2.5, golg: 1.5
P52823	extr: 30, plas: 1, lyso: 1
O95833	cyto: 12.5, cyto_nucl: 11, nucl: 6.5, extr_plas: 5, plas: 4.5, extr: 4.5, mito: 3, pero: 1
Q9NUD5	nucl: 15.5, cyto_nucl: 14, cyto: 11.5, plas: 2, extr: 1, mito: 1, golg: 1
O95873	nucl: 19, plas: 5, mito: 5, cyto: 1, pero: 1, golg: 1
Q13751	extr: 27, pero: 2, cyto_mito: 2, golg: 1
Q7Z7K0	extr: 28, nucl: 2, mito: 2
Q9BWH2	mito: 20, cyto: 5, nucl: 4, pero: 2, extr: 1
P05362	extr: 9, golg: 6, E.R.: 5, pero: 5, plas: 4, lyso: 3
Q92805	cyto: 18, cyto_nucl: 11.3333, cyto_golg: 9.83333, mito: 4, pero: 4, nucl: 3.5, plas: 2
P08183	plas: 31, nucl: 1
Q16610	extr: 27, plas: 2, nucl: 1, pero: 1, golg: 1
Q9NX40	nucl: 18, cyto: 6, E.R.: 3, plas: 2, mito: 2, golg: 1
P07942	extr: 25, plas: 6, lyso: 1
Q9Y2Y0	cyto_nucl: 16, nucl: 13.5, cyto: 13.5, extr: 4, plas: 1
Q15434	nucl: 21, mito: 7, cyto: 3, cysk_plas: 1
P80303	E.R.: 14, extr: 10, mito: 6, nucl: 1, golg: 1
O75503	cyto: 22.5, cyto_nucl: 15, mito: 4, extr: 2, E.R.: 1
O14933	cyto: 17.5, mito: 10, cyto_nucl: 10, extr: 3, nucl: 1.5
P09104	cyto: 23, cyto_nucl: 16, nucl: 5, mito: 3, extr: 1
P54803	mito: 21, extr: 5, pero: 2, plas: 1, cyto: 1, E.R.: 1, lyso: 1
Q9Y4G8	nucl: 16, cyto: 10, plas: 4, mito: 1, E.R.: 1
P20339	mito: 29, cyto: 3
P23634	plas: 31, cyto: 1
Q6ZXV5	E.R.: 14, plas: 10, pero: 4, nucl: 2, mito: 2
Q8NBJ4	extr: 13, E.R.: 12, mito: 3, golg: 3, lyso: 1
O75093	extr: 19, plas: 4, E.R.: 4, lyso: 3, nucl: 1, pero: 1
Q96K49	plas: 30, extr: 2
Q12841	extr: 30, lyso: 2
P61009	extr: 20, mito: 7, pero: 3, cyto: 2
O00469	extr: 10, cyto: 8, cyto_pero: 7.5, mito_pero: 5.66667, pero: 4.5, mito: 3.5, plas: 2, E.R.: 2, nucl: 1, lyso: 1
Q13308	plas: 15, extr: 9, E.R._golg: 3.5, E.R.: 3, lyso: 3, golg: 2
Q9UII2	mito: 28, nucl: 3, cyto: 1
Q00688	mito: 12, nucl: 11.5, cyto_nucl: 10.5, cyto: 8.5
Q5TC84	nucl: 18, cyto_nucl: 16.3333, cyto: 10.5, cyto_golg: 6.83333, golg: 1.5, plas: 1, E.R.: 1
Q8IV20	plas: 12, cyto: 5, E.R.: 4, extr: 3, nucl: 3, mito_pero: 3, mito: 2.5, pero: 2.5
P15151	plas: 22, golg: 4, lyso: 3, E.R.: 2, extr: 1
Q9BSR8	plas: 16, lyso: 7, mito: 4, E.R.: 3, golg: 2
Q86X83	cyto_nucl: 14, cyto: 13.5, nucl: 11.5, extr: 6, mito: 1
Q8NDA8	plas: 19, cyto: 8, cyto_nucl: 6, extr: 2, nucl: 2, lyso: 1
Q8WW59	mito: 25, nucl: 3, cyto: 3, pero: 1
Q03518	plas: 21, nucl: 4, cyto_nucl: 4, cyto: 2, E.R.: 2, extr: 1, mito: 1, lyso: 1
Q6UWE0	nucl: 21.5, cyto_nucl: 14.5, cyto: 6.5, mito: 4
Q9H7C9	cyto: 11.5, mito: 11, cyto_nucl: 8, extr: 4, nucl: 3.5, lyso: 1, golg: 1
Q8TBQ9	plas: 16, extr: 14, E.R.: 1, lyso: 1
P35237	cyto: 21, nucl: 3, mito: 3, lyso: 2, extr: 1, pero: 1, golg: 1
Q92520	extr: 29, plas: 2, lyso: 1
Q96SW2	cyto: 13.5, cyto_nucl: 11.5, nucl: 8.5, cysk: 3, plas: 2, extr: 2, mito: 1, pero: 1, lyso: 1
P21589	pero: 19, plas: 5, extr: 3, E.R.: 2, lyso: 2, mito: 1
Q9P2E9	E.R.: 25, extr: 6, cyto: 1
Q9UBR2	extr: 17, plas: 11, lyso: 3, mito: 1
P52943	nucl: 30.5, cyto_nucl: 17.5
Q7Z3E5	cyto: 13.5, cyto_nucl: 13.5, nucl: 10.5, mito: 5, plas: 1, extr: 1, golg: 1
Q9Y2H6	plas: 22, pero: 5, nucl: 2, cyto: 1, mito: 1, E.R.: 1
Q15847	cyto: 22.5, cyto_nucl: 12, mito: 5, extr: 4
Q92844	cyto: 17, nucl: 12, plas: 1, extr: 1, cysk: 1
L0R6Q1	cyto: 26.5, cyto_nucl: 14.5, extr: 4, nucl: 1.5
Q86W25	cyto: 18, nucl: 4, pero: 4, plas: 3, mito: 2, golg: 1
O75674	cyto: 17, cyto_nucl: 14, nucl: 9, mito: 5, extr: 1
Q9NW68	cyto: 15, nucl: 13, extr: 2, golg: 2
P21695	cyto: 28.5, cyto_nucl: 15, mito: 3
Q9BXS4	extr: 20, plas: 9, lyso: 2, E.R.: 1
P10321	plas: 14, extr: 5, lyso: 5, golg: 4, E.R.: 2, pero: 2
Q9H4G4	mito: 10, extr: 9, cyto: 8, nucl: 4, golg: 1
Q92820	extr: 25, plas: 4, lyso: 2, E.R.: 1
Q9UQN3	cyto: 18, cyto_nucl: 13.5, nucl: 5, extr: 4, mito: 3, pero: 1, golg: 1
P04439	plas: 8, E.R.: 7, extr: 5, lyso: 5, golg: 5, pero: 2
Q8TED1	extr: 21, extr_plas: 12, golg: 7, mito: 2, lyso: 1
P63218	extr: 11, mito: 11, nucl: 6, golg: 2, cyto: 1, lyso: 1
P22694	cyto: 16.5, cyto_nucl: 10.5, mito: 9, nucl: 3.5, pero: 2, lyso: 1
Q9UJ83	cysk: 15, cyto_nucl: 7, nucl: 6.5, cyto: 6.5, mito: 2, extr: 1, pero: 1
Q9Y624	extr: 22, plas: 5, lyso: 4, pero: 1
P46934	nucl: 27, cyto: 5
Q9Y394	E.R.: 25, plas: 2, extr: 2, lyso: 2, pero: 1
Q96HD1	extr: 21, plas: 6, pero: 2, lyso: 2, E.R.: 1
Q9Y2G5	extr: 25, plas: 3, lyso: 2, mito: 1, E.R.: 1
Q9NVM4	cyto: 12, nucl: 8, plas: 5, pero: 3, extr: 2, mito: 2
O95166	mito: 18, extr: 5, cyto_nucl: 5, nucl: 4.5, cyto: 4.5
Q96RF0	nucl: 23, cyto_nucl: 16.5, cyto: 8, mito: 1
Q96LJ7	mito: 13, nucl: 7, cyto: 5.5, cyto_pero: 5, extr: 4, golg: 1
Q8NBM8	extr: 16, E.R.: 11, lyso: 2, plas: 1, nucl: 1, cyto: 1
P09914	cyto: 20, cyto_nucl: 15.8333, cyto_golg: 11.6667, nucl: 6.5, pero: 2, golg: 1.5, extr: 1, mito: 1
P10619	extr: 17, lyso: 9, E.R.: 2, pero: 2, cyto: 1, golg: 1
Q9Y6A9	extr: 7, cyto_nucl: 6.5, cyto: 6, plas: 5, nucl: 5, mito: 5, mito_pero: 4.33333, E.R._mito: 3.33333, pero: 2.5, golg: 1
P09493	cyto: 23, nucl: 4, extr: 3, mito: 2
O94808	plas: 11, cyto: 8.5, cyto_nucl: 8.5, nucl: 5.5, mito: 3, pero: 2, extr: 1, E.R.: 1
Q9GZM5	cyto: 11, cyto_nucl: 10.5, plas: 8, nucl: 8, extr: 2, mito: 1, E.R.: 1, pero: 1
Q6P1Q0	mito: 28, E.R._mito: 15.6667, cyto_mito: 15.6667, plas: 1, pero: 1
P31947	cyto: 24.5, cyto_nucl: 18, nucl: 6.5, mito: 1
Q9H2C0	cyto: 13.5, cyto_plas: 9, nucl: 7, plas: 3.5, E.R.: 3, pero: 3, extr: 1, golg: 1
Q9Y281	cyto_nucl: 12, cyto: 11.5, nucl: 9.5, mito: 8, extr: 3
Q9Y6D6	pero: 9, plas: 8, nucl: 7, cyto: 7, E.R.: 1
Q92599	nucl: 14, cyto: 14, pero: 3, E.R.: 1
Q8NAN2	plas: 16, nucl: 11, cyto_nucl: 8.83333, cyto: 4.5, cyto_mito: 3.16667
P45973	nucl: 32
Q15165	E.R.: 8.5, extr: 7, plas: 6, pero: 5, E.R._mito: 5, lyso: 3, cyto: 1, golg: 1
P13747	extr: 12, plas: 11, E.R.: 5, lyso: 2, mito: 1, pero: 1
Q9HBL7	cyto: 16.5, cyto_nucl: 15, nucl: 10.5, mito: 4, golg: 1
P61769	extr: 32
Q9BQS8	cyto: 17, cyto_nucl: 14.8333, cyto_golg: 10, nucl: 9.5, mito: 3, golg: 1.5, pero: 1
P55085	plas: 27, extr: 3, E.R.: 1, lyso: 1
Q16611	cyto: 10, plas: 7, mito: 5, pero: 5, extr: 2, E.R.: 2, nucl: 1
P53701	cyto: 11.5, extr: 10, cyto_nucl: 7.5, mito: 5, nucl: 2.5, lyso: 2, golg: 1
Q8TCD1	extr: 18, plas: 12, cyto: 2
P80723	nucl: 27.5, cyto_nucl: 15, extr: 2, cyto: 1.5, cysk: 1
Q9Y282	cyto: 13.5, plas: 10.5, cyto_nucl: 9, extr_plas: 6.5, mito: 2, golg: 2, extr: 1.5, E.R.: 1
O95479	extr: 12, plas: 10, E.R.: 5, lyso: 3, pero: 2
Q96PM5	extr: 21, cyto: 6, cyto_nucl: 5.5, nucl: 3, mito: 2
Q9UHN6	plas: 26, nucl: 3, E.R.: 2, golg: 1
P09467	cyto: 19.5, cyto_mito: 11, nucl: 8, mito: 1.5, extr: 1, E.R.: 1, cysk: 1
Q15067	cyto: 21.5, cyto_mito: 12, nucl: 4, pero: 3, mito: 1.5, extr: 1, cysk: 1
Q9BZM5	plas: 19, extr: 13
P30622	nucl: 24.5, cyto_nucl: 18.6667, cyto: 5.5, cyto_golg: 4.83333, extr: 1
P32456	cyto: 12.5, nucl: 12, cyto_mito: 7.5, plas: 3, cysk: 3, mito: 1.5
P08134	cyto: 14.5, cyto_nucl: 11.5, mito: 7, nucl: 5.5, extr: 3, plas: 2
Q9P0R6	cyto: 15.5, extr: 13, cyto_nucl: 10.5, nucl: 2.5, pero: 1
O60831	plas: 29, extr: 2, mito: 1
Q9UI15	cyto: 17.5, cyto_nucl: 15.5, nucl: 6.5, extr: 4, pero: 3, mito: 1
P42345	cyto: 9.5, cyto_nucl: 8.5, nucl: 6.5, plas: 6, pero: 4, cysk: 3, mito: 2, extr: 1
Q08722	plas: 26, extr: 2, lyso: 2, E.R.: 1, pero: 1
Q12846	plas: 18, cyto: 8, mito: 3, pero: 2, golg: 1
P17813	plas: 27, extr_plas: 17.5, extr: 4, E.R.: 1
Q9UK22	cyto_nucl: 16.5, cyto: 15.5, nucl: 12.5, plas: 2, mito: 1, pero: 1
Q969E2	plas: 30, cyto: 2
Q9Y3R5	plas: 15, cyto_nucl: 8.5, nucl: 8, cyto: 7, golg: 2
O95716	cyto: 21, cyto_nucl: 16.5, nucl: 6, lyso: 3, extr: 1, mito: 1
Q13637	cyto: 25.5, cyto_nucl: 16.5, extr: 1, mito: 1, lyso: 1, cysk: 1
Q03519	plas: 14, extr: 6, E.R.: 5, lyso: 4, pero: 2, golg: 1
Q9P2C4	plas: 25, mito: 3, cyto: 2, pero: 1, golg: 1
Q15155	extr: 15, plas: 8, E.R.: 5, pero: 3, lyso: 1
O95786	cyto: 25, mito: 3, nucl: 2, plas: 1, pero: 1
O43278	plas: 23, extr: 6, golg: 2, pero: 1
Q01484	nucl: 22, cyto_nucl: 16.5, cyto: 7, plas: 2, golg: 1
Q99584	cyto: 15, nucl: 14, extr: 1, mito: 1, cysk: 1
Q9NYM9	plas: 15, cyto: 6, cyto_nucl: 6, nucl: 4, mito: 4, extr: 1, E.R.: 1, golg: 1
Q6L8Q7	mito: 24, nucl: 4.5, cyto_nucl: 4.5, cyto: 3.5
Q16698	mito: 15.5, cyto: 15, E.R._mito: 8.5, extr: 1
Q9NQY0	nucl: 20.5, cyto_nucl: 15, cyto: 8.5, extr: 3
Q6NXT6	plas: 28, E.R.: 4
P08648	plas: 17, nucl: 5, E.R.: 3, extr: 2, lyso: 2, golg: 2, mito: 1
P54852	plas: 25, extr: 6, lyso: 1
O14966	extr: 13, cyto: 8, nucl: 6, mito: 4, pero: 1
Q9UBR5	mito: 16, plas: 10, extr: 2, cyto: 2, nucl: 1, E.R.: 1
Q5NDL2	E.R.: 8, plas: 7, extr: 5, mito: 4, pero: 3.5, cyto_pero: 3, nucl: 2, cyto: 1.5, lyso: 1
Q15005	cyto: 10, plas: 8, E.R._mito: 6, nucl: 5, mito: 4.5, extr: 2
Q9NZ45	extr: 24, plas: 5, cyto: 1, mito: 1, E.R.: 1
O95297	extr: 19, plas: 6, golg: 3, E.R.: 1.5, E.R._mito: 1.5, nucl: 1, lyso: 1
Q9Y2Q9	mito: 30, extr: 2
O43169	cyto: 13.5, cyto_nucl: 11, pero: 5, plas: 4, nucl: 3.5, mito: 3, extr: 2, golg: 1
Q15629	plas: 18, mito: 5, cyto: 3, pero: 3, E.R.: 2, golg: 1
Q9NVV0	nucl: 13, cyto_nucl: 12.5, cyto: 10, pero: 4.5, plas: 4, mito_pero: 3
Q9NRX4	cyto: 19.5, cyto_nucl: 11, extr: 8, nucl: 1.5, mito: 1, lyso: 1, golg: 1
Q1KMD3	nucl: 18, cyto_nucl: 16, cyto: 12, mito: 1, cysk_plas: 1
O43657	plas: 25, extr: 7
Q96CD0	extr: 9, nucl: 9, cyto_nucl: 8.5, plas: 7, cyto: 6, mito: 1
Q13753	extr: 24.5, extr_plas: 15, plas: 4.5, E.R.: 1, lyso: 1, cyto_mito: 1
Q5VT79	cyto: 18, cyto_nucl: 16, nucl: 8, extr: 2, mito: 2, pero: 1, cysk: 1
P49459	nucl: 12.5, cyto_nucl: 11, cyto: 8.5, mito: 8, extr: 2, golg: 1
Q7Z5G4	mito: 12, cyto: 11.5, cyto_nucl: 11.5, nucl: 4.5, extr: 2, pero: 1, golg: 1
P01889	plas: 13, E.R.: 8, extr: 5, golg: 4, lyso: 2
O00339	extr: 25, plas: 5, E.R.: 2
P07311	cyto: 26, cyto_nucl: 19.3333, cyto_plas: 14.3333, nucl: 5.5
Q96RQ1	mito: 11, E.R._mito: 10, plas: 8, cyto: 6, nucl: 2, extr: 1, golg: 1
P61916	extr: 31, lyso: 1
O94905	mito: 9, E.R.: 9, extr: 8, cyto: 3, pero: 2, plas: 1
Q8N668	cyto: 16.5, cyto_nucl: 16, nucl: 8.5, extr: 6, mito: 1
Q9HAT2	extr: 8, E.R.: 8, lyso: 6, pero: 5, plas: 4, golg: 1
P16422	extr: 26, E.R.: 4, plas: 2
Q01995	cyto: 25, extr: 3, nucl: 2, mito: 2
Q99523	plas: 24, pero: 4, E.R.: 3, extr: 1
Q9NP61	nucl: 25.5, cyto_nucl: 19.3333, cyto: 6, cyto_golg: 4.33333
P15514	extr: 29, nucl: 2, mito: 1
Q5K651	cyto_nucl: 15.3333, cyto: 15, nucl: 14.5, cyto_mito: 8.33333, plas: 1, pero: 1
Q9H0E2	cyto_nucl: 12, nucl: 9.5, cyto: 9.5, extr: 4, mito: 3, pero: 3, plas: 2, E.R.: 1
Q96HJ9	mito: 23, cyto: 5, nucl: 4
Q9NRX6	extr: 31, plas: 1
P43155	mito: 18, nucl: 10.5, cyto_nucl: 7.5, extr: 2
Q13530	plas: 32
Q9BRP8	cyto: 20.5, cyto_nucl: 13.5, nucl: 5.5, extr: 5, mito: 1
Q71U36	cysk: 13, nucl: 6, cyto: 6, extr: 5, mito: 2
Q8NFF5	cyto: 13.5, cyto_nucl: 10.5, nucl: 6.5, extr: 5, mito: 5, E.R.: 1, cysk_plas: 1
Q5VVQ6	nucl: 28, mito: 4
P13987	extr: 32
P28062	nucl: 16.5, cyto_nucl: 14, cyto: 10.5, extr: 3, mito: 1, golg: 1
Q9BS40	cyto: 24.5, cyto_nucl: 13, mito: 3, extr: 2, pero: 2
P27487	plas: 14, pero: 6, extr: 5, E.R.: 5, lyso: 1, golg: 1
Q6F5E8	nucl: 21.5, cyto_nucl: 15, cyto: 7.5, plas: 2, extr: 1
Q96DC9	cysk: 18, nucl: 7, cyto: 6, extr: 1
Q9NVZ3	cyto: 23.5, cyto_nucl: 17, nucl: 5.5, mito: 2, pero: 1
Q9Y617	cyto: 19, cyto_nucl: 13, nucl: 5, pero: 5, extr: 1, lyso: 1, E.R._mito: 1
Q96RT7	nucl: 16.5, cyto_nucl: 15.5, cyto: 11.5, plas: 4
P61604	mito: 20, cyto: 8, extr: 3, nucl: 1
Q5T1J5	mito: 10.5, cyto_mito: 10.1667, cyto_nucl: 8.5, cyto: 8, extr: 7, cyto_pero: 5.83333, nucl: 5.5
P04049	nucl: 13.5, cyto_nucl: 13, cyto: 11.5, golg: 3, extr: 2, mito: 2
Q9Y5K6	cyto_nucl: 15, nucl: 14.5, cyto: 14.5, extr: 1, E.R.: 1, pero: 1
P43246	nucl: 27, cyto: 3, plas: 1, golg: 1
Q7Z7A3	mito: 10, extr: 8, plas: 5, cyto: 5, nucl: 4
Q8IYS1	cyto: 16, cyto_nucl: 13.5, nucl: 7, mito: 5, extr: 2, pero: 2
P20248	cyto: 11, cyto_nucl: 9, nucl: 5, cysk: 4, plas: 3, mito_pero: 3, extr: 2, mito: 2, E.R.: 2, pero: 2, golg: 1
Q96C36	E.R._mito: 12.3333, mito: 9.5, extr: 8, mito_pero: 7.83333, pero: 3.5, cyto: 2.5, cyto_nucl: 2.5, golg: 2, nucl: 1.5
P09601	cyto: 18, pero: 10, nucl: 2, mito: 2
P49748	mito: 22.5, mito_pero: 13.5, nucl: 3.5, cyto_nucl: 3.5, pero: 3.5, cyto: 2.5
P16219	mito: 28.5, cyto_mito: 15.5, cyto: 1.5, extr: 1, pero: 1
P20290	nucl: 16, cyto: 8, mito: 7, extr: 1
Q8WY22	extr: 30, plas: 2
P49643	nucl: 26, cyto: 3, mito: 3
P28562	nucl: 12.5, cyto_nucl: 12, cyto: 8.5, plas: 6, extr: 4, mito: 1
Q14807	mito: 15, nucl: 10, cyto_mito: 9.5, mito_pero: 8.33333, cyto_nucl: 7.33333, extr: 4, cyto: 2.5
Q9Y421	nucl: 21, extr: 7, cyto: 4
Q658P3	plas: 29, mito: 1, E.R.: 1, cyto_nucl: 1
Q15334	plas: 11, nucl: 8, cyto: 6, mito: 6, E.R.: 1
Q9H5V9	cyto: 15, extr: 9, nucl: 7, mito: 1
Q99986	mito: 16, cyto: 10.5, cyto_nucl: 8.5, nucl: 5.5
Q9NVP1	nucl: 32
Q15758	plas: 32
P46734	cyto: 14, nucl: 13, mito: 5
P17026	nucl: 30.5, cyto_nucl: 17.5
P84022	mito: 12.5, cyto_mito: 12, cyto_nucl: 10.8333, cyto: 9.5, nucl: 8.5, cyto_pero: 7.33333
P11908	cyto: 20, cyto_nucl: 15, nucl: 4, pero: 3, mito: 2, plas: 1, lyso: 1, golg: 1
Q9BZM4	extr: 14, plas: 7, mito_pero: 4.83333, mito: 4.5, E.R._mito: 3.16667, pero: 3, cyto: 2, lyso: 1
Q8WUQ7	nucl: 29.5, cyto_nucl: 16, cyto: 1.5, mito: 1
Q9ULH1	nucl: 31, cyto: 1
Q9H9Y2	cyto: 17.5, cyto_nucl: 14.5, nucl: 10.5, mito: 4
Q8NBI5	plas: 29, extr: 2, pero: 1
P55160	plas: 26, pero: 4, cyto: 1, E.R.: 1
P26358	cyto: 15.5, cyto_nucl: 15.5, nucl: 12.5, pero: 3, extr: 1
Q13185	nucl: 32
O94952	cyto: 12, cyto_nucl: 10, pero: 7, nucl: 6, mito: 3, E.R.: 3, plas: 1
Q0VDF9	cyto: 7.5, pero: 6.5, extr: 6, cyto_nucl: 6, mito_pero: 5.5, plas: 4, nucl: 3.5, mito: 3.5, lyso: 1
P49761	nucl: 22.5, cyto_nucl: 15, cyto: 6.5, mito: 3
Q8NBJ7	extr: 14, mito: 13, E.R.: 2, golg: 2, plas: 1
Q00059	mito: 11, mito_nucl: 11, extr: 10, nucl: 9, plas: 2
O43633	cyto: 18, extr: 5, mito: 5, nucl: 4
P37235	cyto: 24.5, cyto_nucl: 17.5, nucl: 5.5, extr: 1, pero: 1
Q13472	nucl: 13, cyto_nucl: 11.5, mito: 10, cyto: 8, pero: 1
P24821	extr: 17, plas: 7, E.R.: 4, lyso: 3, pero: 1
Q9GZL7	nucl: 20.5, cyto_nucl: 14, cyto: 6.5, plas: 3, mito: 1, cysk: 1
Q96DG6	cyto: 23, cyto_nucl: 12.8333, cyto_plas: 12.3333, extr: 3, pero: 2, nucl: 1.5, mito: 1, cysk: 1
Q13526	cyto: 11.5, cyto_nucl: 11, nucl: 9.5, extr: 7, mito: 4
P78540	mito: 21.5, E.R._mito: 11.5, cyto_nucl: 5.5, nucl: 4, cyto: 3, pero: 2, plas: 1
P63146	nucl: 15.5, cyto_nucl: 12, cyto: 7.5, mito: 7, extr: 1, golg: 1
Q8NAB2	cyto: 19, nucl: 5, plas: 4, extr: 2, E.R.: 1, pero: 1
Q9UIV1	cyto: 17, cyto_nucl: 12.5, nucl: 6, cysk: 4, mito: 3, extr: 2
Q01973	plas: 29, E.R.: 2, lyso: 1
O14678	plas: 7, extr: 6, lyso: 6, pero: 4, mito: 3.5, E.R.: 3, cyto_mito: 3, cyto: 1.5, nucl: 1
Q9Y3B9	nucl: 30, extr: 1, cysk: 1
O15347	nucl: 32
Q9UN76	plas: 32
Q9Y244	nucl: 12, cyto_nucl: 12, cyto: 10, extr: 9, mito: 1
P12235	mito: 15, cyto: 8, extr: 6, pero: 2, E.R.: 1
Q99880	nucl: 32
O75691	nucl: 19, cyto_nucl: 15, cyto: 9, cysk: 3, plas: 1
Q9NQZ2	nucl: 19, mito: 8, cyto: 3, extr: 2
Q99717	mito: 21, nucl: 7, cyto_nucl: 6, cyto: 3, extr: 1
Q96ST2	nucl: 26.5, cyto_nucl: 17, cyto: 4.5, plas: 1
O00483	mito: 21, extr: 6, cyto: 4, nucl: 1
Q15397	nucl: 25.5, cyto_nucl: 17.5, cyto: 6.5
Q9H3G5	E.R.: 13, lyso: 6, pero: 4.5, plas: 3, mito: 3, cyto_pero: 3, extr: 2
Q9UBT7	cyto: 21, nucl: 5, mito: 2, golg: 2, E.R.: 1, cysk: 1
Q13057	extr: 10, mito: 10, lyso: 6, pero: 3, E.R.: 2, plas: 1
Q9BVP2	nucl: 30, cyto: 1, mito: 1
P05386	cyto: 17, cyto_nucl: 13.5, nucl: 6, extr: 4, mito: 4, cysk: 1
P35625	extr: 25, cyto: 3, lyso: 3, mito: 1
P14635	cyto_mito: 15.8333, mito: 15.5, cyto: 15, cyto_nucl: 8.33333, cysk: 1
P29317	plas: 28, E.R.: 2, extr: 1, nucl: 1
Q96CX2	nucl: 20, cyto: 6, extr: 5, golg: 1
Q86YN1	plas: 21.5, extr_plas: 12.5, cyto_nucl: 5, cyto: 4, extr: 2.5, E.R.: 2
Q11128	plas: 10, extr: 8, E.R.: 4, golg: 4, cyto: 2.5, cyto_mito: 2.5, lyso: 2, mito: 1.5
Q99543	nucl: 30.5, cyto_nucl: 16, mito: 1
Q8N488	nucl: 30.5, mito_nucl: 16, cyto: 1
Q330K2	mito: 27, pero: 3, cyto: 2
Q9NRZ9	cyto: 21, nucl: 7, pero: 3, extr: 1
P33316	mito: 22.5, mito_pero: 12, cyto: 6.5, cyto_nucl: 4.5, nucl: 1.5, extr: 1
P61218	cyto_nucl: 9.5, cyto: 9, extr: 8, nucl: 8, plas: 3, mito: 2, E.R.: 1, cysk: 1
Q9BRS2	nucl: 15.5, cyto_nucl: 14, cyto: 11.5, pero: 2, extr: 1, E.R.: 1, cysk_plas: 1
P18085	mito: 27, cyto: 4.5, cyto_nucl: 3
Q9NV31	cyto_nucl: 11.5, cyto: 9.5, nucl: 8.5, mito: 8, extr: 5, pero: 1
Q9NZJ9	nucl: 30.5, cyto_nucl: 16, mito: 1
P57764	plas: 15, nucl: 14, cyto: 3
Q8IVL1	nucl: 19, cyto_nucl: 12.5, mito: 6, cyto: 4, extr: 3
O15116	cyto: 21, cyto_nucl: 19.1667, cyto_plas: 12.6667, nucl: 9, mito: 1
Q6P9A2	mito: 21, E.R._mito: 17.1667, cyto_mito: 13, E.R.: 7, cyto: 2, plas: 1, nucl: 1
Q8NFP9	plas: 23, cyto: 3, E.R.: 3, extr: 1, nucl: 1, golg: 1
O60675	nucl: 31, mito: 1
P53350	nucl: 14, cyto_nucl: 12.5, cyto: 9, mito: 3.5, pero: 3, E.R._mito: 2.5, plas: 1, extr: 1
Q9Y5V0	nucl: 30.5, cyto_nucl: 16, mito: 1
P62805	nucl: 32
Q71DI3	nucl: 32
O60870	nucl: 32
P07305	nucl: 31, cysk: 1
Q99848	nucl: 22.5, cyto_nucl: 16, cyto: 8.5, cysk: 1
Q8IYL3	mito: 21, nucl: 4, extr: 3, golg: 2, cyto: 1, lyso: 1
Q9BX40	nucl: 23, cyto: 6, mito: 3
Q9BV57	cyto: 18.5, cyto_nucl: 13.5, nucl: 5.5, mito: 5, pero: 2, extr: 1
A6NHL2	nucl: 11, cyto_nucl: 10.5, cyto: 8, extr: 5, pero: 3, cysk: 3, plas: 1, mito: 1
Q99933	nucl: 29, cyto: 2, mito: 1
Q8WUW1	cyto: 15, cyto_nucl: 12, extr: 8, nucl: 5, cysk: 2, mito: 1, pero: 1
Q9Y3E7	cyto: 17, cyto_nucl: 11.5, extr: 5, nucl: 4, mito: 4, pero: 1, golg: 1
Q9NR30	nucl: 30, cyto: 1, cysk_plas: 1
Q6UWP2	extr: 17, cyto_nucl: 5.5, nucl: 5, cyto: 4, mito: 3, lyso: 2, plas: 1
Q9Y6E2	mito: 15.5, cyto_mito: 13.1667, cyto: 9.5, cyto_nucl: 8.83333, nucl: 6, lyso: 1
Q6DN03	nucl: 14.5, extr: 13, cyto_nucl: 9.5, cyto: 3.5, golg: 1
Q9BWE0	nucl: 31, cyto_nucl: 17
P49759	nucl: 27, cyto: 3, plas: 1, pero: 1
Q9UNQ2	cyto: 19, mito: 12, extr: 1
Q92766	nucl: 31, cyto: 1
Q9Y2Z9	mito: 11.5, extr: 7.5, cyto_mito: 6.83333, extr_plas: 5.5, pero: 3, lyso: 3, plas: 2.5, golg: 2, cyto_nucl: 1.33333, E.R.: 1
Q9BQG0	nucl: 23, cyto_nucl: 16.8333, cyto: 8.5, cyto_mito: 5.16667
Q92688	nucl: 19, cyto: 10, mito: 2, pero: 1
P15407	nucl: 31.5, cyto_nucl: 16.5
Q8IUF8	cyto_nucl: 16.6667, cyto: 15, nucl: 14, cyto_golg: 9.33333, extr: 1, cysk: 1
Q6PL18	nucl: 24, cyto: 8
P07477	extr: 27, lyso: 4, golg: 1
P28347	nucl: 32
Q9ULW0	nucl: 18, cyto_nucl: 16, cyto: 12, E.R.: 1, cysk: 1
Q92522	nucl: 28, cyto: 4
P00533	plas: 30, extr: 1, E.R.: 1
P68431	nucl: 32
Q96T88	nucl: 29.5, cyto_nucl: 17.5, cyto: 2.5
P00918	cyto: 25, mito: 6, nucl: 1
O95235	nucl: 18.5, cyto_nucl: 16.5, cyto: 11.5, golg: 2
Q96FF9	nucl: 30, cyto_nucl: 17, cyto: 2
Q5TEZ5	cyto: 25.5, cyto_nucl: 13.5, mito: 6
Q8IUE6	nucl: 32
P50502	nucl: 21, cyto: 11
Q9Y324	cyto: 13.5, cyto_nucl: 10.5, extr: 9, nucl: 6.5, mito: 3
Q53GA4	cyto: 19, cyto_nucl: 15.5, nucl: 10, plas: 1, extr: 1, E.R.: 1
Q9UNW9	nucl: 21.5, cyto_nucl: 14, cyto: 5.5, plas: 3, E.R.: 1, golg: 1
P15531	cyto: 19.5, cyto_nucl: 16.5, cyto_plas: 12.6667, nucl: 5, extr: 2, lyso: 2, mito: 1, cysk: 1
Q6FI13	nucl: 32
Q15147	cyto: 16.5, nucl: 11, cyto_mito: 9, pero: 3, extr: 1
P04818	cyto: 15.5, cyto_nucl: 15, nucl: 9.5, extr: 2, mito: 2, cysk: 2, E.R.: 1
P10412	nucl: 27, extr: 2, mito: 2, cyto: 1
P42025	cysk: 27, nucl: 2, cyto: 2, mito: 1
P16403	nucl: 27, extr: 2, mito: 2, cyto: 1
Q9H939	cyto: 19.5, cyto_nucl: 15, nucl: 7.5, plas: 4, mito: 1
Q9BXS6	nucl: 25.5, cyto_nucl: 15.5, cyto: 4.5, E.R.: 1, cysk: 1
Q58FF6	cyto: 20, nucl: 7, extr: 2, mito: 1, E.R.: 1, lyso: 1
Q96F63	cyto: 19, cyto_nucl: 13.5, nucl: 6, extr: 4, plas: 1, E.R.: 1, pero: 1
O00767	cyto: 18, cyto_nucl: 12, cysk: 5, nucl: 4, E.R.: 2, extr: 1, mito: 1, golg: 1
Q16533	nucl: 25, cyto: 5, plas: 1, E.R.: 1

## Sheet: location_value_max
Locations	Name	#Diff	DiffSeqs
extr	extracellular	65	P02795;P05121;P04732;O75326;Q14061;Q96HE7;Q9C002;P07858;Q9Y5U9;P80297;Q9UI42;Q6UXH1;P09382;Q9UM22;O43493;P00749;P52823;Q13751;Q7Z7K0;P05362;Q16610;P07942;Q8NBJ4;O75093;Q12841;P61009;O00469;Q92520;Q9UBR2;Q9BXS4;Q92820;Q8TED1;P63218;Q9Y624;Q96HD1;Q9Y2G5;Q8NBM8;P10619;Q9Y6A9;P13747;P61769;Q8TCD1;O95479;Q96PM5;Q15155;O14966;Q9NZ45;O95297;Q96CD0;Q13753;O00339;P61916;Q9HAT2;P16422;P15514;Q9NRX6;P13987;…
nucl	nucleus	105	P52926;O15075;Q8IVF2;Q9NS25;P46821;Q99942;P01584;Q8NDC0;Q9BXN6;Q6JBY9;Q01432;O60711;Q5SZL2;Q9NUD5;O95873;Q9NX40;Q9Y2Y0;Q15434;Q9Y4G8;Q5TC84;Q6UWE0;P52943;P46934;Q96RF0;Q92599;P45973;P80723;P30622;Q01484;Q9NQY0;Q9NVV0;Q1KMD3;P49459;Q9NP61;Q9H0E2;Q5VVQ6;P28062;Q6F5E8;Q96RT7;P04049;Q9Y5K6;P43246;P20290;P49643;P28562;Q9Y421;Q9NVP1;P17026;Q8WUQ7;Q9ULH1;Q13185;P49761;Q13472;Q9GZL7;P63146;Q9Y3B9;O15347;…
plas	plasma membrane	72	Q01628;Q9BXT2;Q9Y653;Q14697;P27701;P21926;P02751;Q96S97;O14495;O95832;P30530;Q9NXK6;Q6P9B6;O75976;Q07954;Q6PI78;O15321;P17301;P48060;P15509;P43121;P08183;P23634;Q96K49;Q13308;Q8IV20;P15151;Q9BSR8;Q8NDA8;Q03518;Q8TBQ9;Q9Y2H6;P10321;P04439;O94808;Q8NAN2;P55085;Q9UHN6;Q9BZM5;O60831;Q08722;Q12846;P17813;Q969E2;Q9Y3R5;Q03519;Q9P2C4;O43278;Q9NYM9;Q6NXT6;P08648;P54852;Q15629;O43657;P01889;Q99523;Q13530;…
cyto	cytosol	109	P52566;Q96K17;P04179;Q13885;P11234;P23921;P28288;Q14116;Q6PCE3;O95810;P63313;Q4G0X4;Q2TB90;P49662;Q14764;O95833;Q92805;O75503;O14933;P09104;Q86X83;Q9H7C9;P35237;Q96SW2;Q7Z3E5;Q15847;Q92844;L0R6Q1;Q86W25;O75674;Q9NW68;P21695;Q9UQN3;P22694;Q9NVM4;P09914;P09493;Q9GZM5;P31947;Q9H2C0;Q9Y281;Q9HBL7;Q9BQS8;Q16611;P53701;Q9Y282;P09467;Q15067;P32456;P08134;Q9P0R6;Q9UI15;P42345;Q9UK22;O95716;Q13637;O95786;…
mito	mitochondria	46	P02679;Q14533;Q9UKV8;Q5JS37;O14832;Q9BWH2;P54803;P20339;Q9UII2;Q00688;Q8WW59;Q9H4G4;O95166;Q96LJ7;Q6P1Q0;Q6L8Q7;Q16698;Q9UBR5;Q9Y2Q9;Q7Z5G4;Q96RQ1;O94905;Q96HJ9;P43155;P61604;Q5T1J5;Q7Z7A3;Q96C36;P49748;P16219;Q14807;Q99986;P84022;Q00059;P78540;P12235;Q99717;O00483;P14635;Q330K2;P33316;P18085;Q6P9A2;Q8IYL3;Q9Y6E2;Q9Y2Z9
E.R.	endoplasmic reticulum	9	Q9Y673;P20908;P80303;Q6ZXV5;Q9P2E9;Q9Y394;Q15165;Q5NDL2;Q9H3G5
pero	peroxisome	2	P21589;Q9Y6D6
cysk	cytoskeleton	4	Q9UJ83;Q71U36;Q96DC9;P42025
